# Supplementary material for: Highly efficient planar perovskite solar cells with a TiO2/ZnO electron transport bilayer
Source: Royal Society of Chemistry journal article supplement (doi:10.1039/c5ta04239a), 2015-01-01
Supplement: c5ta04239a1.pdf [file c5ta04239a1.pdf]

**Supplementary Information for**  
**Highly efficient planar perovskite solar cells with a TiO<sub>2</sub>/ZnO**  
**electron transport bilayer**

Xin Xu, Huiyin Zhang, Jiangjian Shi, Juan Dong, Yanhong Luo, Dongmei Li, and  
Qingbo Meng\*

*Key Laboratory for Renewable Energy (CAS), Beijing Key Laboratory for New  
Energy Materials and Devices, Beijing National Laboratory for Condense Matter  
Physics, Institute of Physics, Chinese Academy of Sciences, Beijing 100190, China*

*\*Corresponding authors: 86-10-8264 9242 Email addresses: [qbmeng@iphy.ac.cn](mailto:qbmeng@iphy.ac.cn)*

## 1. The XRD pattern of different ETL

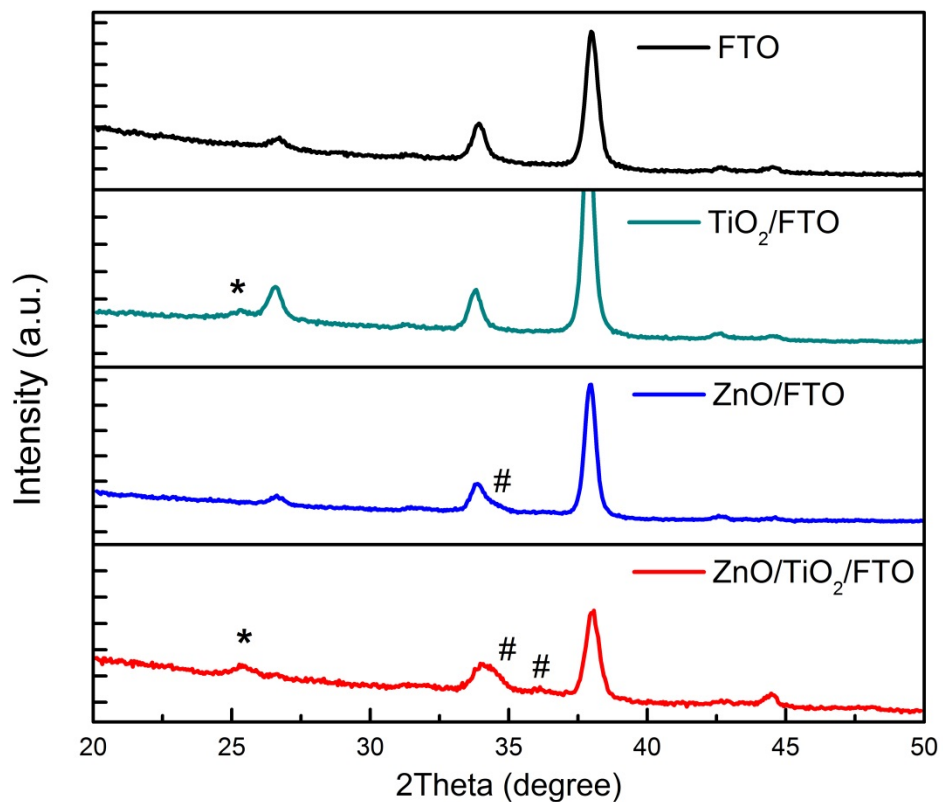

**Figure S1** Grazing Incidence X-ray Diffraction (GIXRD) patterns of different electron transport layers. Asterisk (\*) refers to TiO<sub>2</sub>, hash (#) refers to ZnO and other peaks belong to FTO substrate.

## 2. Band alignment of TiO<sub>2</sub>/ZnO interface

The band offset at the TiO<sub>2</sub>/ZnO surface can be calculated by the following equation:

$$\Delta E_V = \left( Zn2p_{\frac{3}{2}} - ZnO^{VBM} \right) - \left( Ti2p_{\frac{3}{2}} - TiO_2^{VBM} \right) - \Delta E_{CL}$$

When employ the XPS data, we conclude that the valance band offset between the TiO<sub>2</sub> and ZnO is 0.19eV, that the ZnO is higher than TiO<sub>2</sub>. Thus the TiO<sub>2</sub> and ZnO will form a type-II band structure, which will benefit for the charge separation and transport in ETL [1, 2].

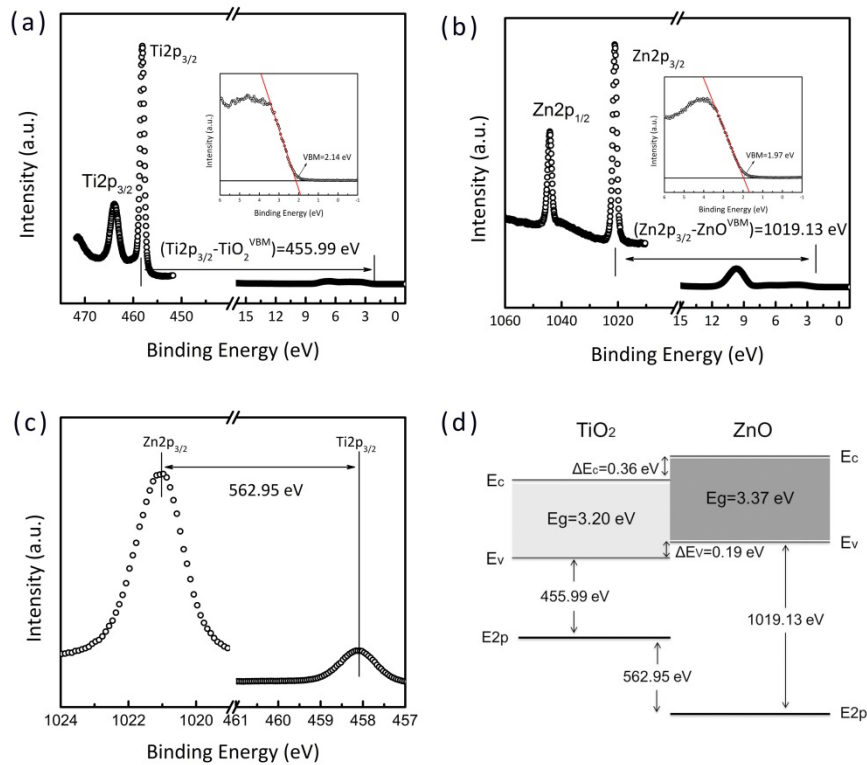

**Figure S2** XPS spectrum of (a) core-level Ti 2p and valance band of TiO<sub>2</sub>, (the inset is the detailed spectrum near the valance band maximum.) (b) core-level Zn 2p and valance band of ZnO, (the inset is the detailed spectrum near the valance band maximum.) and (c) high resolution spectra of Zn 2p<sub>3/2</sub> and Ti 2p<sub>3/2</sub> of TiO<sub>2</sub>/ZnO bilayer. (d) Band alignment of TiO<sub>2</sub>/ZnO.

### 3. Exponential fitting of I-V curves of planar perovskite solar cells with different ETLs.

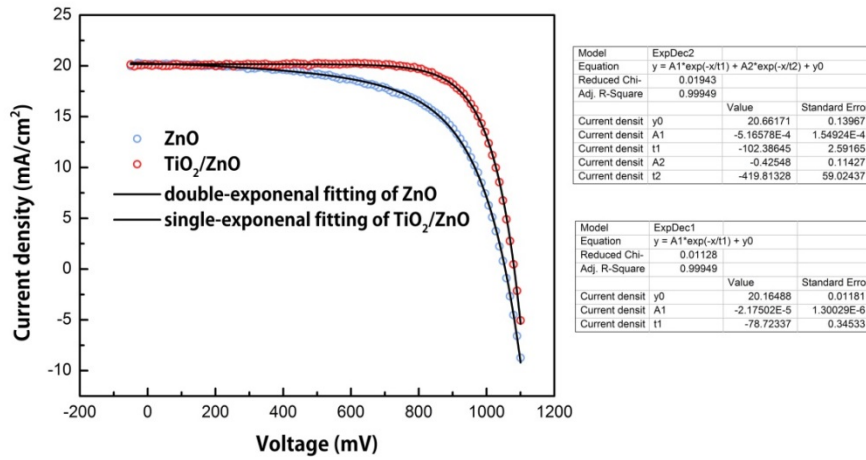

**Figure S3** *I-V* curves of planar perovskite solar cells with ZnO and TiO<sub>2</sub>/ZnO ETL. The dark lines are the exponential fittings respectively.

It could be seen that the TiO<sub>2</sub>/ZnO ETL perovskite solar cells can be fitted with single exponent while the ZnO ETL devices is well fitted by double exponent. The results suggest that the perovskite absorber might contact the FTO to form a Schottky diode in ZnO ETL devices, which will increase shunt paths. When the TiO<sub>2</sub> is employed into the ETL, the recombination paths will be reduced.

#### 4. Thickness optimization of planar perovskite solar cells with different electron transport layer

##### *Devices using ZnO ETL*

When the ZnO is 20nm, the devices exhibit bad performances with low open-circuit voltages and fill factors. The power-conversion efficiency began to increase with ETL thickness increasing. But when an 80nm-thick ETL is used, the efficiency became to decrease again due to the reduced fill factors. After optimization, we found that device with a 50nm-thick ZnO layer ETL performed the best. Merely increasing ETL thickness cannot further improve the performance of planar perovskite solar cells.

**Table S1** Performances of ZnO ETL perovskite solar cells with different ZnO thickness.

| ZnO thickness | $J_{SC}$ (mA/cm <sup>2</sup> ) | $V_{OC}$ (mV) | $FF$  | PCE (%) |
|---------------|--------------------------------|---------------|-------|---------|
| 20nm          | 19.61                          | 923.6         | 0.545 | 9.864   |
| 50nm          | 19.56                          | 1048.6        | 0.634 | 13.011  |
| 80nm          | 19.6                           | 1025.6        | 0.555 | 11.158  |

##### *Devices using TiO<sub>2</sub>/ZnO ETL*

When a layer of TiO<sub>2</sub> was added under the ZnO layer, the performance of devices was significant enhanced, with an obvious increasing in fill factors. The best performance can be achieved with TiO<sub>2</sub>/ZnO 10nm/50nm.

**Table S2** Performances of TiO<sub>2</sub>/ZnO ETL perovskite solar cells with different TiO<sub>2</sub> thickness. All ZnO thicknesses here are optimized to 50nm.

| TiO <sub>2</sub> thickness | $J_{SC}$ (mA/cm <sup>2</sup> ) | $V_{OC}$ (mV) | $FF$  | PCE (%) |
|----------------------------|--------------------------------|---------------|-------|---------|
| 30nm                       | 17.95                          | 1079.4        | 0.691 | 13.388  |
| 10nm                       | 19.36                          | 1074.3        | 0.741 | 15.416  |
| <5nm                       | 19.05                          | 1079.4        | 0.6   | 12.34   |
| TiCl <sub>4</sub> treat    | 18.65                          | 1090.3        | 0.647 | 13.158  |

**Devices only using TiO<sub>2</sub> ETL**

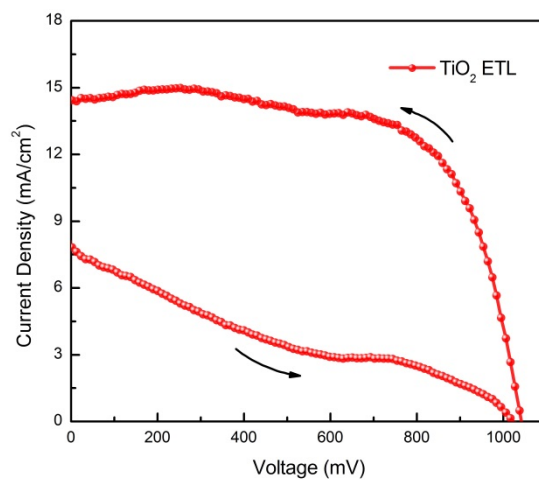

**Figure S4** *I-V* curves of planar perovskite solar cells using spin-coating TiO<sub>2</sub> (50nm) as ETL.

Scan rate: 100mV/s.

Great hysteresis can be seen in the *I-V* curves. Huge difference of PCEs between forward (from short circuit to forward bias, 2.1%) and backward (from forward bias to short circuit, 10.2%) exists due to the poor electron collection of TiO<sub>2</sub>. This result suggested that the TiO<sub>2</sub> made by spin coating method may not suit for planar perovskite solar cells, if without modification.

## 5. Performances of TiO<sub>2</sub>/ZnO perovskite solar cells under different scan rate.

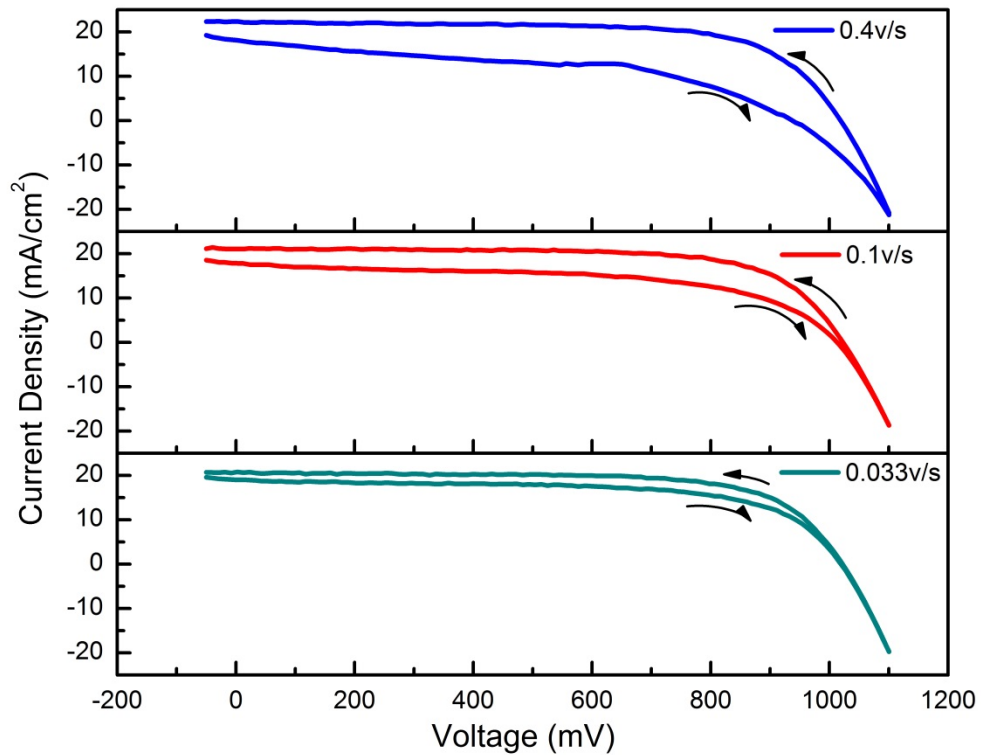

**Figure S5** Performances of TiO<sub>2</sub>/ZnO perovskite solar cells under different scan rate.

Devices were tested under different voltage scan rate of 0.4V/s, 0.1V/s and 0.033V/s. This result suggested that the hysteresis reduced when the scan rate decreased. Compared to devices only using TiO<sub>2</sub> as ETL, the hysteresis can be well improved.

## 6. The stabilities of devices with TiO<sub>2</sub>, ZnO and TiO<sub>2</sub>/ZnO ETLs.

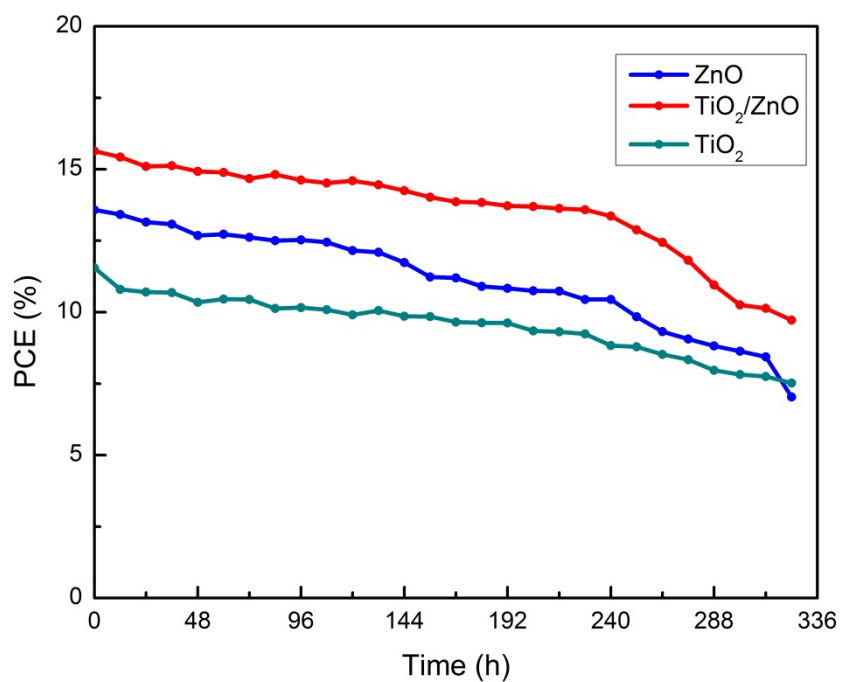

**Figure S6** The stabilities of devices with different ETLs. The solar cells were stored in dark with 30%RH humidity and measured by every 12 hours.

- [1] S.-J. Roh, R.S. Mane, S.-K. Min, W.-J. Lee, C.D. Lokhande, S.-H. Han, Appl. Phys. Lett. 89 (2006) 253512.
- [2] K. Shen, K. Wu, D. Wang, Mater. Res. Bull. 51 (2014) 141-144.
